# Supplementary material for: ERRα mediates metabolic adaptations driving lapatinib resistance in breast cancer
Source: PubMed Central journal article supplement (PMC4945959; doi:10.1038/ncomms12156), 2016-07-12
Supplement: ncomms12156-s1.pdf [file ncomms12156-s1.pdf]

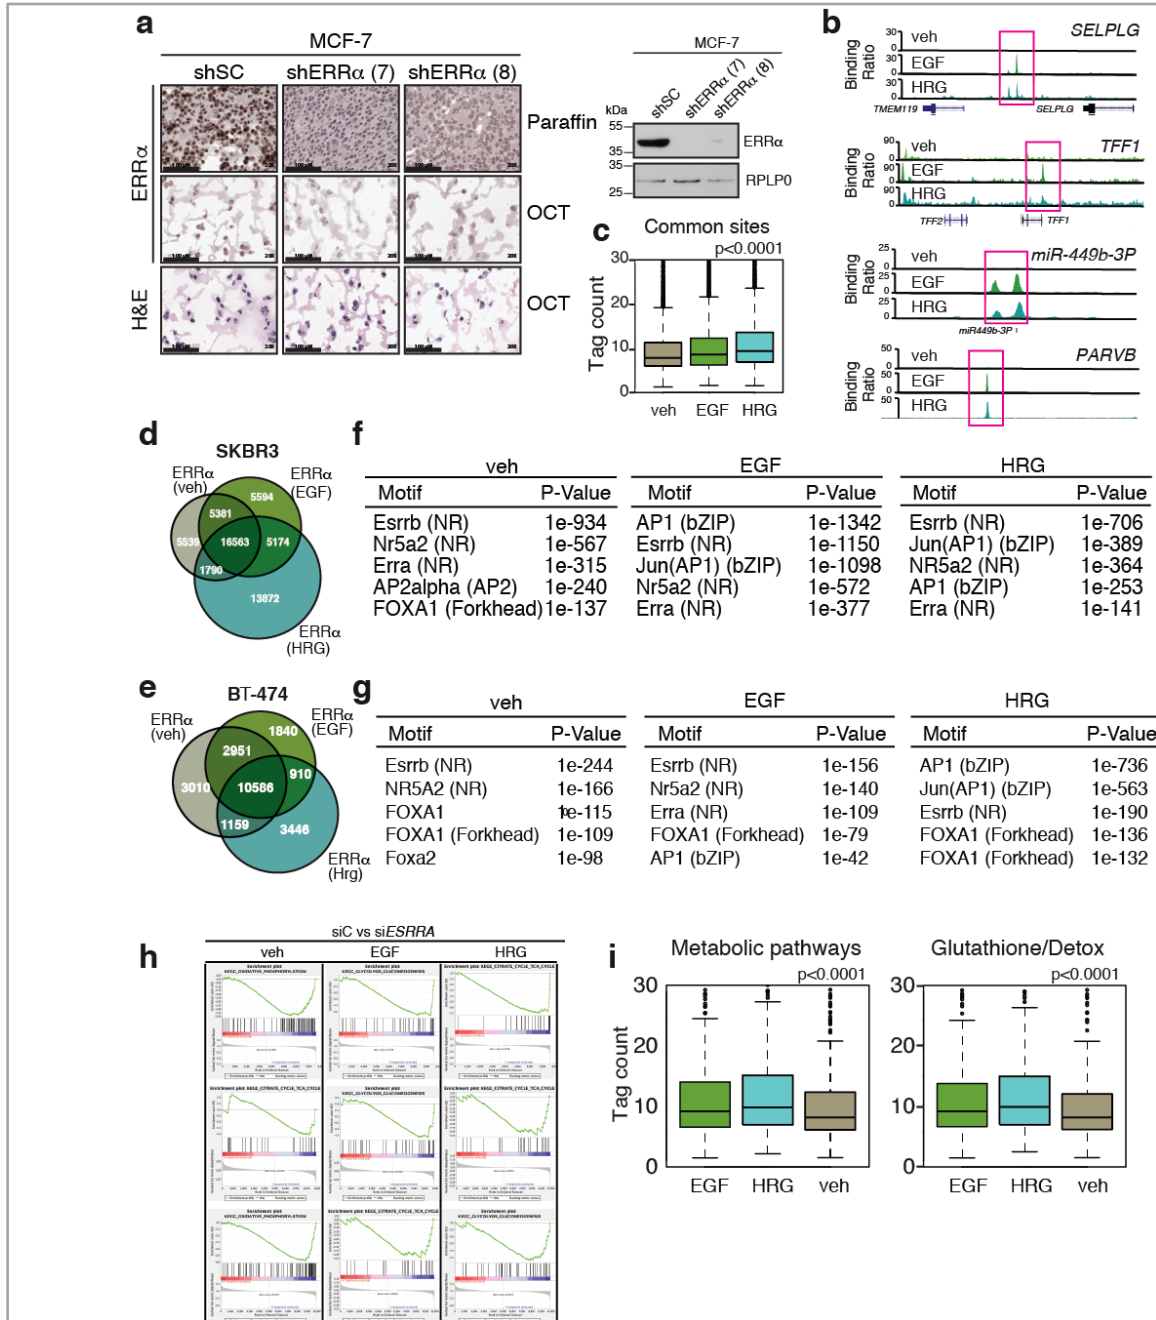

**Supplementary Figure 1 | Reprogramming of ERR $\alpha$  binding profile by growth factors.** (a) Immunohistochemical analyses of ERR $\alpha$  of paraffin or OCT embedded MCF-7 clones stably transfected with shSC or two different shERR $\alpha$ . Western blot depicting the levels of ERR $\alpha$  upon shERR $\alpha$ -induced ERR $\alpha$  depletion is shown on the right panel. (b) Examples of binding profiles for ERR $\alpha$  on growth factor-reprogrammed sites in SKBr3 cells upon 90 min of EGF or HRG treatment. (c) Box plot representing the distribution of tag counts across the different peaks determined by ERR $\alpha$  ChIP-seq for each treatment conditions in SKBr3. Statistical significance calculated by one-way analysis of variance (ANOVA). (d) Venn diagram representing number of ERR $\alpha$ -bound segments obtained by ChIP-seq in SKBr3 cells. (e) *de novo* motif computational discovery in ERR $\alpha$ -bound sequences in SKBr3 cells in common or in EGF- and HRG-specifically bound segments. Enrichment of AP1 binding site specifically upon EGF or HRG treatment is highlighted in yellow. (f) Venn diagram representing number of ERR $\alpha$ -bound segments obtained by ChIP-Sequencing analyses in BT-474 cells upon 90 min stimulation with EGF or HRG. (g) *De novo* motif computational discovery in ERR $\alpha$ -bound sequences in BT-474 cells in total veh-treated or in EGF- and HRG-specifically bound segments. (h) Examples of top gene set enrichments from KEGG pathways by GSEA upon siRNA-mediated depletion of ERR $\alpha$  in all 3 treatment conditions (FDR<25%). (i) Box plot representing the distribution of tag counts across the different peaks for each treatment conditions in SKBr3 determined by ERR $\alpha$  ChIP-seq and falling within +/- 20 kb of the TSS of genes controlling cellular and energy metabolism (left panel, One-way Anova: p<0.0001) or glutathione and detoxification functions (right panel, one-way anova: p<0.0001). Gene lists filtered according to functions reported in ref. <sup>1</sup>.

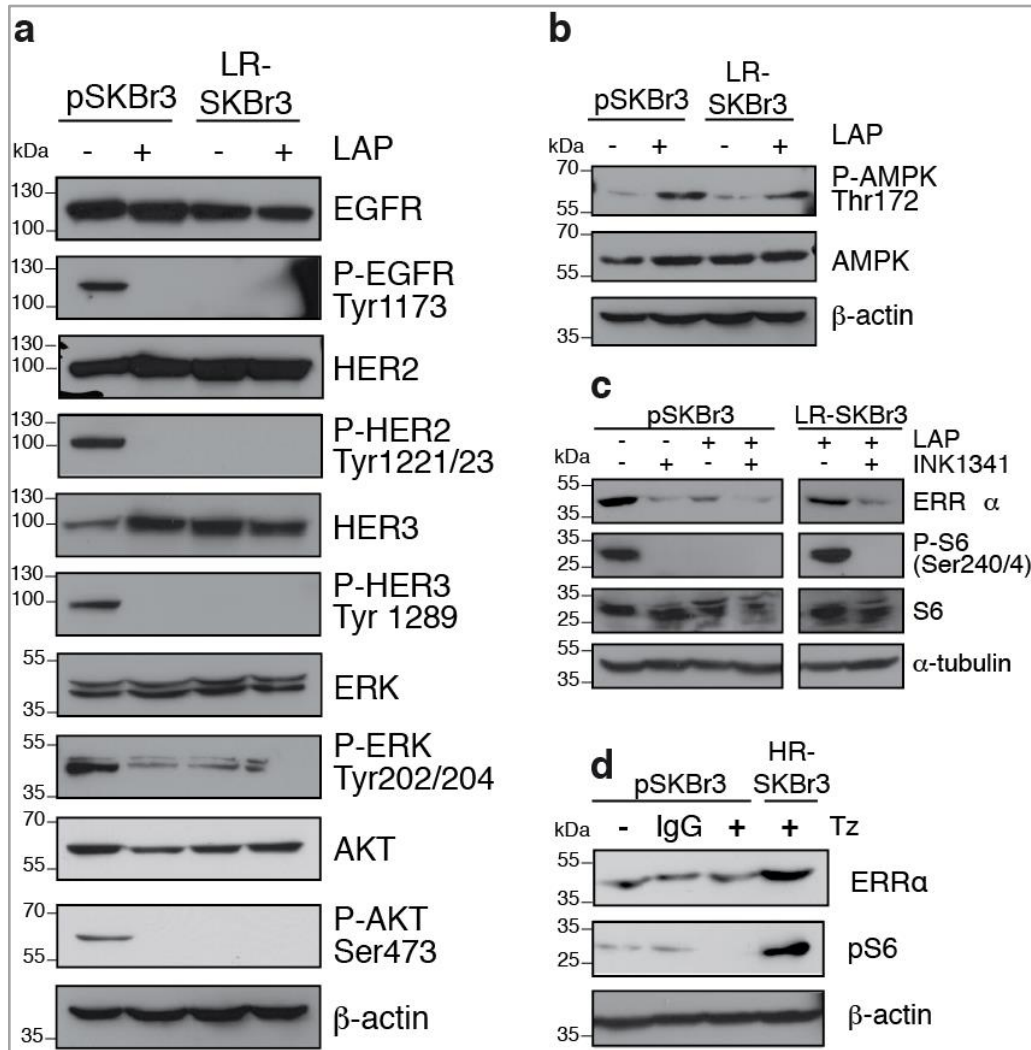

**Supplementary Figure 2 | Growth factor signalling is affected in lapatinib-resistant cells.** (a) Western blot showing the expression of basal and phosphorylated forms of EGFR/HER2/HER3 and downstream effectors ERK and AKT in pSKBr3 and LR-SKBr3 cells upon 24h lapatinib or veh treatment. (b) Western blot depicting the expression of AMPK and P-AMPK in pSKBr3 and LR-SKBr3 cells upon 24h lapatinib or veh treatment. (c) Expression of ERR $\alpha$ , S6 and P-S6 in pSKBr3 and pSKBr3 (left) and LR-SKBr3 (right) cells upon lapatinib or veh treatment in presence or absence of the mTORC1 inhibitor INK1341 treatment. Lap, lapatinib; veh, vehicle. (d) Western blot showing the expression of ERR $\alpha$  and of phosphorylated S6 (pS6) in SKBr3 cells that have been generated to become resistant to Trastuzumab treatment.

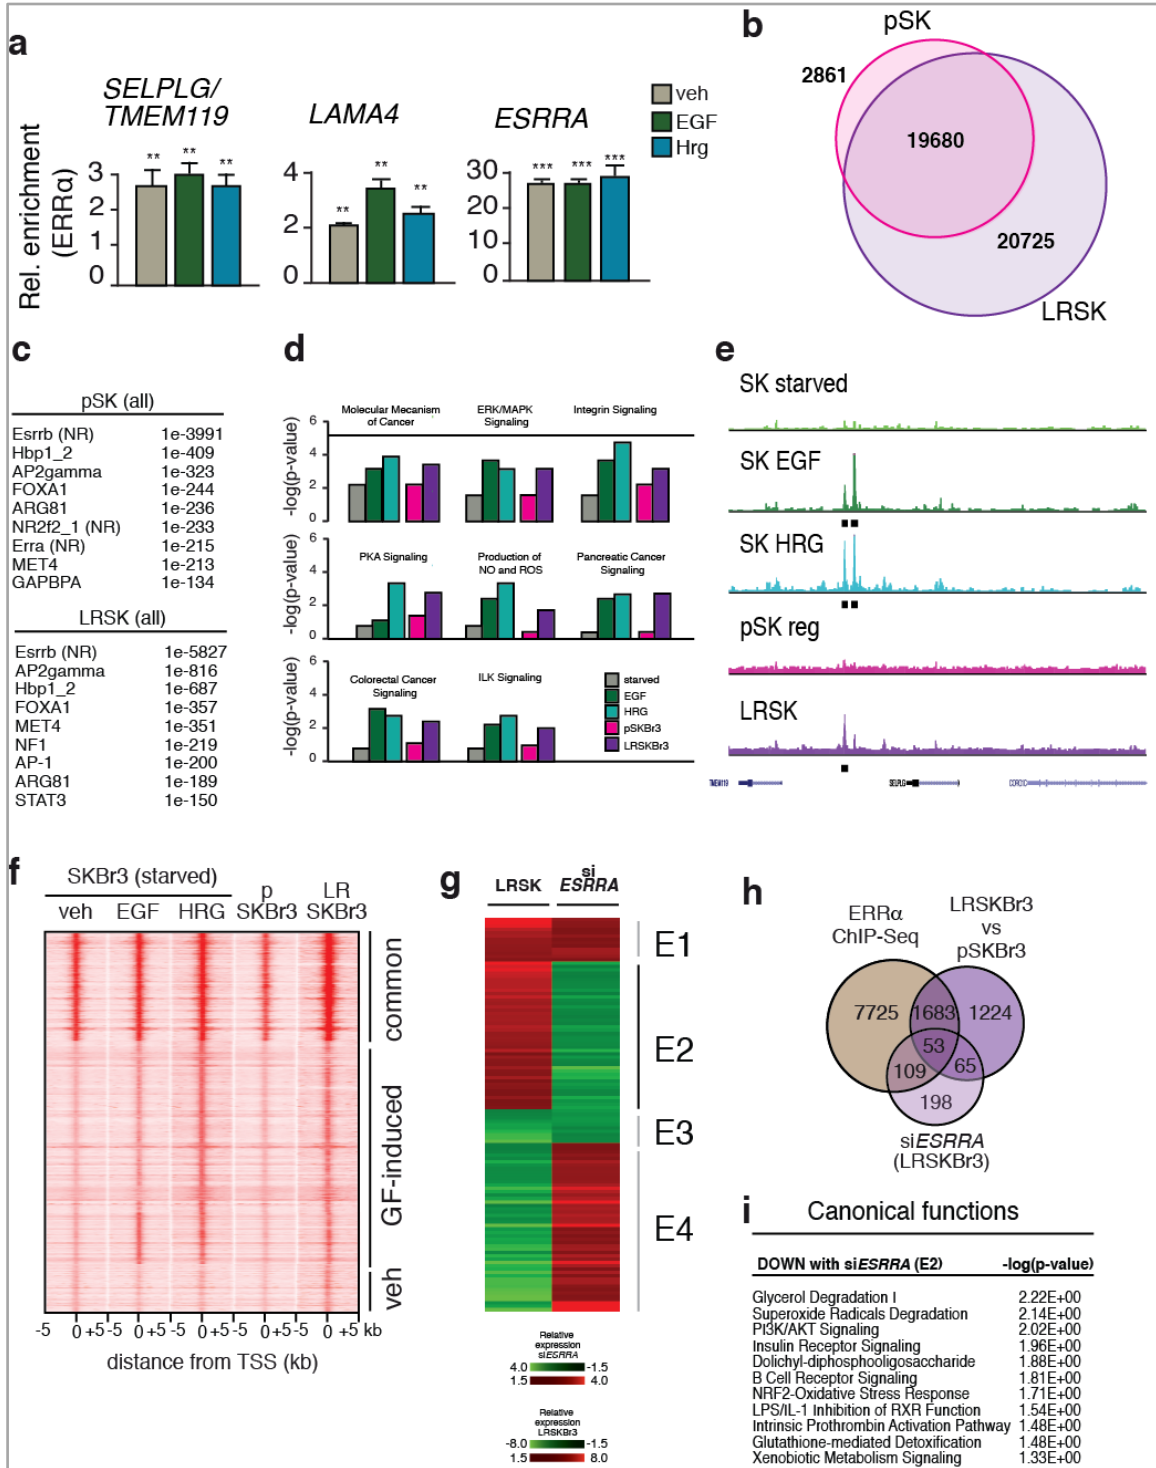

**Supplementary Figure 3 | ERR $\alpha$  transcriptional activity in lapatinib-resistant cells.**

**(a)** Standard ChIP experiment showing the enrichment of ERR $\alpha$  recruitment to growth factor-reprogrammed sites according to ChIP-Seq, upon EGF and HRG stimulation in LRSKBr3 cells maintained in serum-starved media. *ESRRA* is used as a non-reprogrammed bound segment. Representative graph of 3 independent experiments performed in triplicates, error bars represent standard error of the mean, statistical significance is calculated using 2-tailed unpaired t-test \*\*,  $p < 0.01$ ; \*\*\*,  $p < 0.001$ . **(b)** Venn diagram depicting the overlap observed upon ChIP-seq between genomic segments bound by ERR $\alpha$  in untreated SKBr3 and those bound in LRSKBr3 cells maintained in lapatinib. **(c)** Computational discovery of *de novo* motif binding sites in ERR $\alpha$ -bound sequences in untreated pSKBr3 cells and in LRSKBr3 cells maintained in lapatinib according to ChIP-Seq results. **(d)** Enrichment of canonical pathways by IPA associated with target genes bound by ERR $\alpha$  within +/-10kb of their TSS in pSKBr3 and LRSKBr3 cells. **(e)** Examples of binding profiles for ERR $\alpha$  on lapatinib resistant-reprogrammed sites in SKBr3 cells treated with veh, EGF or HRG and in pSKBr3 cells and LRSKBr3 cells maintained in lapatinib. **(f)** Heatmap showing the intensities of ERR $\alpha$  binding events in SKBr3 cells for each peak determined from ERR $\alpha$  ChIP-seq upon EGF or HRG and in pSKBr3 cells and LRSKBr3 cells maintained in lapatinib and clustered according to peaks commonly bound by ERR $\alpha$  or in growth factor induced binding sites. **(g)** Heatmap showing hierarchical clustering of the genes with expression profile significantly modulated in LRSKBr3 cells compared to pSKBR3 cells and compared to genes with expression significantly modulated in LRSKBr3 cells upon depletion of ERR $\alpha$  using siRNA. **(h)** Overlap between target genes with an ERR $\alpha$ -bound genomic segment at +/-10kb of their TSS, genes significantly modulated in LRSKBr3 cells compared to pSKBr3 cells and genes significantly modulated in LRSKBr3 cells upon depletion of ERR $\alpha$  using siRNA. **(i)** Enrichment of canonical pathways by IPA associated with common target genes from clusters defined in **(g)**.

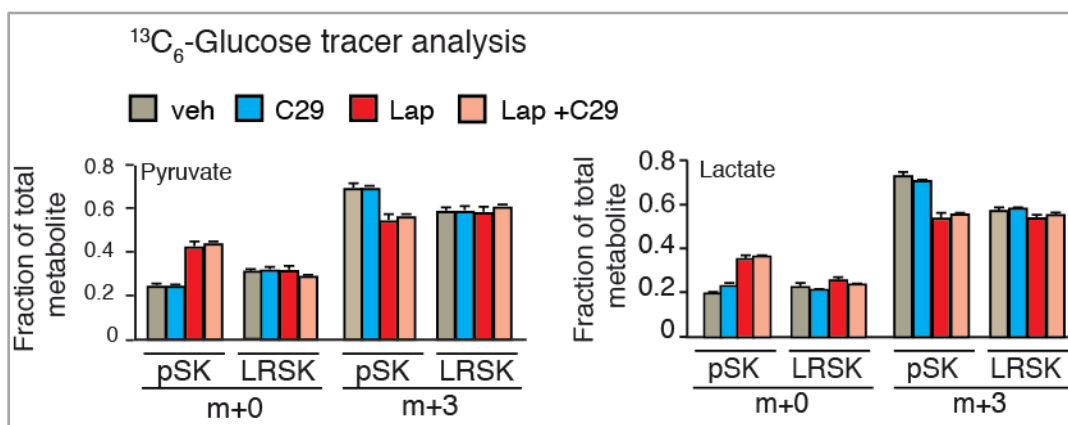

**Supplementary Figure 4. <sup>3</sup>C<sub>6</sub>-glucose flux in parental and lapatinib-resistant SKBr3 cells.** Quantification of the fraction of intermediate metabolites pyruvate (m+3), lactate (m+3) produced from the tracing uniformly <sup>13</sup>C<sub>6</sub>-labeled glucose in pSKBr3 and LRSKBr3 cells upon lapatinib treatment and pharmacological inhibition of ERR $\alpha$  with C29. The m+0 ion represents the fraction of un-labelled metabolite.

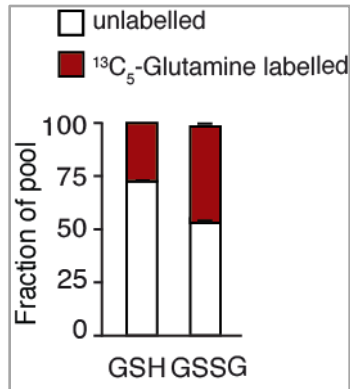

**Supplementary Figure 5. Glutamine contribution to glutathione biosynthesis in SKBr3 cells.** Fractional contribution of <sup>13</sup>C<sub>5</sub>-glutamine into reduced glutathione (GSH) and oxidized glutathione (GSSG) biosynthesis in SKBr3 cells incubated for 6h in the presence of the tracer. Unlabelled fraction is m+0, labelled fraction is the fraction occupied by m+1 to m+8 isotopomers (GSH) or m+1 to m+12 isotopomers (GSSG). Data is shown as average values from biological triplicates taken from a representative experimental set.

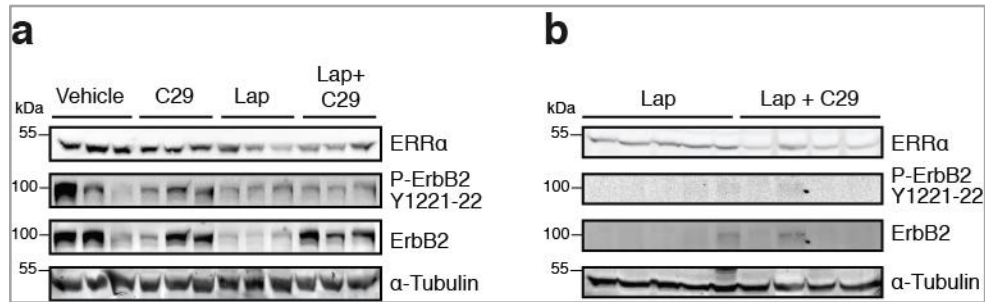

**Supplementary Figure 6. ERBB2 and ERRα expression upon treatment with lapatinib and C29.** (a) Western blot showing the quantification of ERRα, ErbB2 and P-ErbB2 Y1221-22 in NIC tumours from mice treated with vehicle, C29, Lapatinib or Lapatinib in combination with C29. α-tubulin is used as loading control. (b) Western blot showing the quantification of ERRα, ErbB2 and P-ErbB2 Y1221-22 in lapatinib-resistant NIC tumors from mice treated with vehicle, C29, Lapatinib or Lapatinib in combination with C29. α-tubulin is used as loading control.



**Supplementary Table 1 | siESRRA in SKBr3 (starved) with ERR $\alpha$  binding sites**

| <b>Canonical Pathway (DOWN)</b>          | <b>-log (p-value)</b> | <b>GENES</b>        |
|------------------------------------------|-----------------------|---------------------|
| Role of IL-17F in Inflammatory Airway    | 1.95                  | TRAF3IP2,IGF1       |
| Synaptic Long Term Depression            | 1.86                  | PNPLA8,PLA2G4E,IGF1 |
| Phospholipases                           | 1.75                  | PNPLA8,PLA2G4E      |
| Eicosanoid Signalling                    | 1.68                  | PNPLA8,PLA2G4E      |
| MAPK Signalling in Influenza             | 1.62                  | PNPLA8,PLA2G4E      |
| Growth Hormone Signalling                | 1.60                  | IGF1,CEBPA          |
| Acyl-CoA Hydrolysis                      | 1.38                  | ACOT7               |
| Antioxidant Action of Vitamin C          | 1.34                  | PNPLA8,PLA2G4E      |
| TCA Cycle II (Eukaryotic)                | 1.30                  | ACO2                |
|                                          |                       |                     |
| <b>Canonical Pathway (UP)</b>            | <b>-log (p-value)</b> | <b>GENES</b>        |
| Small Cell Lung Cancer Signalling        | 1.87                  | FHIT,MAX            |
| IL-4 Signalling                          | 1.84                  | IL4R,SYNJ1          |
| Melanocyte Development                   | 1.72                  | ADCY5,ATF2          |
| FGF Signalling                           | 1.72                  | FGFR1,ATF2          |
| GDP-glucose Biosynthesis                 | 1.71                  | HK1                 |
| Glycogen Degradation II                  | 1.61                  | AGL                 |
| Renin-Angiotensin Signalling             | 1.53                  | ADCY5,ATF2          |
| PTEN Signalling                          | 1.47                  | SYNJ1,FGFR1         |
| p38 MAPK Signalling                      | 1.46                  | MAX,ATF2            |
| P2Y Purigenic Receptor Signalling        | 1.44                  | ADCY5,ATF2          |
| PI3K Signalling in B Lymphocytes         | 1.40                  | IL4R,ATF2           |
| GNRH Signalling                          | 1.39                  | ADCY5,ATF2          |
| D-myo-inositol (1,4,5)-trisphosphate     | 1.36                  | SYNJ1               |
| Cardiomyocyte Differentiation            | 1.34                  | ATF2                |
| Hepatic Fibrosis / Hepatic Stellate Cell | 1.33                  | IL4R,FGFR1          |

**Supplementary Table 2 | siESRRA in SKBr3 (growth factors) with ERR $\alpha$  binding sites**

| <b>Canonical Pathway (DOWN)</b>                        | <b>-log (p-value)</b> | <b>GENES</b>                           |
|--------------------------------------------------------|-----------------------|----------------------------------------|
| Glioblastoma Multiforme Signalling                     | 2.71                  | WNT7A,WNT9A,SOS2,CDKN1A,NF2,PDGFRB     |
| Fatty Acid Activation                                  | 2.25                  | ACSL6,ACSL4                            |
| Colanic Acid Building Blocks Biosynthesis              | 2.18                  | GALK2,UGP2                             |
| $\hat{\Gamma}^3$ -linolenate Biosynthesis II (Animals) | 2.02                  | ACSL6,ACSL4                            |
| Mitochondrial L-carnitine Shuttle Pathway              | 2.02                  | ACSL6,ACSL4                            |
| Putrescine Degradation III                             | 2.02                  | IL4I1,ALDH1B1                          |
| LPS/IL-1 Mediated Inhibition of RXR                    | 1.87                  | PPARA,IL4I1,ALDH1B1,ACSL6,CHST11,ACSL4 |
| Role of NANOG in ES Cell Pluripotency                  | 1.78                  | WNT7A,WNT9A,SOS2,BMP8                  |
| Flavin Biosynthesis IV (Mammalian)                     | 1.76                  | RFK                                    |
| Wnt/ $\hat{\Gamma}^2$ -catenin Signalling              | 1.75                  | WNT7A,WNT9A,RARB,KREMEN1,RARG          |
| ERK5 Signalling                                        | 1.72                  | CREB1,GNA13,ELK4                       |
| JAK/Stat Signalling                                    |                       |                                        |
| Regulation of the EMT Pathway                          | 1.66                  | WNT7A,WNT9A,SOS2,PDGFRB,PSEN1          |
| Basal Cell Carcinoma Signalling                        | 1.59                  | WNT7A,WNT9A,BMP8B                      |
| Thyroid Hormone Biosynthesis in                        | 1.58                  | IYD                                    |
| BMP signalling                                         | 1.54                  | CREB1,PITX2,BMP8B                      |

|                                          |                 |                                                   |
|------------------------------------------|-----------------|---------------------------------------------------|
| pathway                                  |                 |                                                   |
| Fatty Acid b-oxidation I                 | 1.54            | ACSL6,ACSL4                                       |
| Human Embryonic Stem Cell Pluripotency   | 1.51            | WNT7A,WNT9A,BMP8B,PDGFRB                          |
| Aryl Hydrocarbon Receptor Signalling     | 1.45            | ALDH1B1,CDKN1A,RARB,RARG                          |
| Axonal Guidance Signalling               | 1.44            | MYL9,SRGAP3,WNT7A,WNT9A<br>SOS2,GNA13,BMP8B,EIF4E |
| Prostate Cancer Signalling               | 1.43            | SOS2,CREB1,CDKN1A                                 |
| Stearate Biosynthesis I (Animals)        | 1.42            | ACSL6,ACSL4                                       |
| PAK Signalling                           | 1.37            | MYL9,SOS2,PDGFRB                                  |
| Lysine Degradation II                    | 1.36            | AADAT                                             |
| Galactose Degradation I (Leloir Pathway) | 1.36            | GALK2                                             |
| Cardiac Hypertrophy Signalling           | 1.36            | MYL9,CACNA1E,CREB1,GNA13,EIF4E                    |
| Role of THOP1 in Alzheimer's Disease     | 1.34            | KNG1,CREB1                                        |
| PPAR Signalling                          | 1.34            | PPARA,SOS2,PDGFRB                                 |
| SAPK/JNK Signalling                      | 1.32            | MAP4K3,SOS2,GNA13                                 |
| Glycogen Biosynthesis II (UDP-D-Glu)     | 1.32            | UGP2                                              |
| IGF-1 Signalling                         | 1.32            | SOS2,SOCS4,IGFBP1                                 |
| Molecular Mechanisms of Cancer           | 1.31            | SOS2,CDKN1A,GNA13,BMP8B,RALGDS,PSEN1              |
| Phospholipases                           | 1.31            | PLD3,PLA2G2C                                      |
| PI3K/AKT Signalling                      | 1.30            | SOS2,CDKN1A,EIF4E                                 |
|                                          |                 |                                                   |
| <b>Canonical Pathway (UP)</b>            | <b>- log(p-</b> | <b>GENES</b>                                      |

|                                  | <b>value)</b> |                                             |
|----------------------------------|---------------|---------------------------------------------|
| Ephrin Receptor Signalling       | 1.78          | MAP3K14,RGS3,GNAI1,ABL1,PGF                 |
| IL-10 Signalling                 | 1.70          | SOCS3,MAP3K14,CD14                          |
| Intrinsic Prothrombin Activation | 1.63          | COL1A2,COL11A2                              |
| Axonal Guidance Signalling       | 1.53          | SRGAP3,BMP4,RGS3,UNC5B,GNAI1,ABL1,BMP8B,PGF |
| Biotin-carboxyl Carrier Protein  | 1.48          | HLCS                                        |
| Lactose Degradation III          | 1.48          | LCT                                         |
| Factors Promoting Cardiogenesis  | 1.41          | BMP4,DKK1,BMP8B                             |
| Bladder Cancer Signalling        | 1.40          | FGF21,ABL1,PGF                              |

**Supplementary Table 3 | LRSKBr3 vs pSK (canonical pathways)**

| <b>UP</b>                                             | <b>-log (p-value)</b> | <b>DOWN</b>                                       | <b>-log (p-value)</b> |
|-------------------------------------------------------|-----------------------|---------------------------------------------------|-----------------------|
| Cell Cycle Control of Chromosomal Replication         | 1.26E+01              | D-myo-inositol (1,4,5)-Trisphosphate Biosynthesis | 2.38E+00              |
| Role of BRCA1 in DNA Damage Response                  | 1.16E+01              | NRF2-mediated Oxidative Stress Response           | 2.19E+00              |
| Role of CHK Proteins in Cell Cycle Checkpoint Control | 1.10E+01              | Aldosterone Signalling in Epithelial Cells        | 1.97E+00              |
| Mismatch Repair in Eukaryotes                         | 9.21E+00              | Thiamin Salvage III                               | 1.92E+00              |
| Hereditary Breast Cancer Signalling                   | 8.21E+00              | Mechanisms of Viral Exit from Host Cells          | 1.90E+00              |
| Estrogen-mediated S-phase Entry                       | 7.52E+00              | Methylglyoxal Degradation III                     | 1.80E+00              |
| ATM Signalling                                        | 7.13E+00              | Glutathione Redox Reactions I                     | 1.75E+00              |
| Mitotic Roles of Polo-Like Kinase                     | 6.61E+00              | Role of NFAT in Cardiac Hypertrophy               | 1.62E+00              |
| Cell Cycle: G2/M DNA Damage Checkpoint Regulation     | 6.36E+00              | Glutamine Biosynthesis I                          | 1.62E+00              |
| Aryl Hydrocarbon Receptor Signalling                  | 5.52E+00              | Phospholipase C Signalling                        | 1.61E+00              |
| Cell Cycle: G1/S Checkpoint Regulation                | 5.06E+00              | Gap Junction Signalling                           | 1.38E+00              |
| Cyclins and Cell Cycle Regulation                     | 4.96E+00              | Glutathione-mediated Detoxification               | 1.35E+00              |
| GADD45 Signalling                                     | 4.20E+00              | Actin Cytoskeleton Signalling                     | 1.33E+00              |
| Breast Cancer Regulation by Stathmin1                 | 3.95E+00              | Heme Biosynthesis from Uroporphyrinogen-III I     | 1.32E+00              |
| Gap Junction Signalling                               | 3.70E+00              | NAD Biosynthesis III                              | 1.32E+00              |
| Molecular Mechanisms of Cancer                        | 3.61E+00              | Corticotropin Releasing Hormone Signalling        | 1.31E+00              |
| 14-3-3-mediated Signalling                            | 3.54E+00              | Agrin Interactions at Neuromuscular Junction      | 1.30E+00              |
| Remodelling of Epithelial Adherens Junctions          | 3.11E+00              |                                                   |                       |
| p53 Signalling                                        | 2.96E+00              |                                                   |                       |
| Sertoli Cell-Sertoli Cell Junction Signalling         | 2.68E+00              |                                                   |                       |
| Antiproliferative Role of TOB in T Cell Signalling    | 2.61E+00              |                                                   |                       |
| Prostate Cancer Signalling                            | 2.60E+00              |                                                   |                       |

|                                                      |           |  |  |  |
|------------------------------------------------------|-----------|--|--|--|
| Salvage Pathways of Pyrimidine Ribonucleotides       | 2.54E+00  |  |  |  |
| Pyridoxal 5'-phosphate Salvage Pathway               | 2.49E+00  |  |  |  |
| Pyrimidine Deoxyribonucleotides De Novo Biosyn       | 2.48E+00  |  |  |  |
| Small Cell Lung Cancer Signalling                    | 2.30E+00  |  |  |  |
| Epithelial Adherens Junction Signalling              | 2.26E+00  |  |  |  |
| RAN Signalling                                       | 2.23E+00  |  |  |  |
| Interferon Signalling                                | 2.18E+00  |  |  |  |
| Superoxide Radicals Degradation                      | 2.16E+00  |  |  |  |
| DNA damage-induced 14-3-3if Signalling               | 2.09E+00  |  |  |  |
| Regulation of Cellular Mechanics by Calpain Protease | 2.06E+00  |  |  |  |
| Antigen Presentation Pathway                         | 2.05E+00  |  |  |  |
| Ovarian Cancer Signalling                            | 2.00E +00 |  |  |  |
| Pancreatic Adenocarcinoma Signalling                 | 2.00E+00  |  |  |  |
| Pyrimidine Ribonucleotides Interconversion           | 1.91E+00  |  |  |  |
| Hepatic Cholestasis                                  | 1.90E+00  |  |  |  |
| Pyrimidine Ribonucleotides De Novo Biosynthesis      | 1.80E+00  |  |  |  |
| Hypoxia Signalling in the Cardiovascular System      | 1.80E+00  |  |  |  |
| Role of MAPK Signalling                              | 1.78E+00  |  |  |  |
| IL-17A Signalling in Gastric Cells                   | 1.76E+00  |  |  |  |
| Thio-molybdenum Cofactor Biosynthesis                | 1.65E+00  |  |  |  |
| Xanthine and Xanthosine Salvage                      | 1.65E+00  |  |  |  |
| Glutathione-mediated Detoxification                  | 1.62E+00  |  |  |  |
| cAMP-mediated signalling                             | 1.58E+00  |  |  |  |
| LPS/IL-1 Mediated Inhibition of RXR Function         | 1.57E+00  |  |  |  |
| Ubiquinol-10 Biosynthesis (Eukaryotic)               | 1.55E+00  |  |  |  |

|                                             |          |  |  |  |
|---------------------------------------------|----------|--|--|--|
| Protein Ubiquitination Pathway              | 1.55E+00 |  |  |  |
| Toll-like Receptor Signalling               | 1.44E+00 |  |  |  |
| Triacylglycerol Biosynthesis                | 1.44E+00 |  |  |  |
| IL-17A Signalling in Fibroblasts            | 1.37E+00 |  |  |  |
| CDP-diacylglycerol Biosynthesis I           | 1.37E+00 |  |  |  |
| Methionine Degradation I (to Homocysteine)  | 1.37E+00 |  |  |  |
| Guanine and Guanosine Salvage I             | 1.36E+00 |  |  |  |
| Adenine and Adenosine Salvage I             | 1.36E+00 |  |  |  |
| Putrescine Biosynthesis III                 | 1.36E+00 |  |  |  |
| Colorectal Cancer Metastasis Signalling     | 1.35E+00 |  |  |  |
| Lysine Degradation II                       | 9.72E-01 |  |  |  |
| Cysteine Biosynthesis III (mammalia)        | 1.27E+00 |  |  |  |
| Antioxidant Action of Vitamin C             | 1.20E+00 |  |  |  |
| NRF2-mediated Oxidative Stress Response     | 9.66E-01 |  |  |  |
| Glucose and Glucose-1-phosphate Degradation | 7.36E-01 |  |  |  |
| Glutathione-mediated Detoxification         | 1.62E+00 |  |  |  |
| Xenobiotic Metabolism Signalling            | 5.09E-01 |  |  |  |
| Glycogen Degradation II                     | 6.95E-01 |  |  |  |
| Ketolysis                                   | 6.95E-01 |  |  |  |
| Ketogenesis                                 | 6.58E-01 |  |  |  |

**Supplementary Table 4 | siESRRA in LRSKBr3 (canonical pathways)**

| <b>DOWN</b>                          | <b>-log (p-value)</b> | <b>UP</b>       | <b>-log (p-value)</b> |
|--------------------------------------|-----------------------|-----------------|-----------------------|
| Telomere Extension by Telomerase     | 2.04E+00              | non significant |                       |
| L-cysteine Degradation II            | 2.01E+00              |                 |                       |
| Cysteine Biosynthesis/Homocysteine   | 1.71E+00              |                 |                       |
| Role of Tissue Factor in Cancer      | 1.63E+00              |                 |                       |
| CD40 Signalling                      | 1.63E+00              |                 |                       |
| Growth Hormone Signalling            | 1.53E+00              |                 |                       |
| Phenylethylamine Degradation I       | 1.42E+00              |                 |                       |
| Coagulation System                   | 1.40E+00              |                 |                       |
| Glycerol Degradation I               | 1.39E+00              |                 |                       |
| Lysine Degradation II                | 1.38E+00              |                 |                       |
| Antigen Presentation Pathway         | 1.37E+00              |                 |                       |
| Inhibition of Matrix Metalloprotease | 1.36E+00              |                 |                       |
| Bladder Cancer Signalling            | 1.35E+00              |                 |                       |
| Acetyl-CoA Biosynthesis I (PDH)      | 1.34E+00              |                 |                       |
| Superoxide Radicals Degradation      | 1.34E+00              |                 |                       |
| Glycogen Biosynthesis II             | 1.33E+00              |                 |                       |
| Ketolysis                            | 1.31E+00              |                 |                       |
| Ketogenesis                          | 1.30E+00              |                 |                       |



**Supplementary Table 5 | siESRRA in LRSKBr3 \_AND\_ LRSKBr3 vs pSK (pathways)**

| <b>DOWN</b>                                    | <b>-log(p-value)</b> | <b>UP</b>                                  | <b>-log(p-value)</b> |
|------------------------------------------------|----------------------|--------------------------------------------|----------------------|
| LPS/IL-1 Mediated Inhibition of RXR Function   | 2.04E+00             | Methionine Degradation I (to Homocysteine) | 1.45E+00             |
| Glycerol Degradation I                         | 2.01E+00             | Extrinsic Prothrombin Activation Pathway   | 1.42E+00             |
| Superoxide Radicals Degradation                | 1.93E+00             | Leukotriene Biosynthesis                   | 1.42E+00             |
| FGF Signalling                                 | 1.91E+00             | Cysteine Biosynthesis III (mammalia)       | 1.39E+00             |
| Xenobiotic Metabolism Signalling               | 1.74E+00             |                                            |                      |
| Role of Tissue Factor in Cancer                | 1.70E+00             |                                            |                      |
| Dolichyl-diphosphooligosaccharide Biosynthesis | 1.67E+00             |                                            |                      |
| PI3K/AKT Signalling                            | 1.62E+00             |                                            |                      |
| Insulin Receptor Signalling                    | 1.56E+00             |                                            |                      |
| Extrinsic Prothrombin Activation Pathway       | 1.51E+00             |                                            |                      |
| B Cell Receptor Signalling                     | 1.41E+00             |                                            |                      |
| NRF2-mediated Oxidative Stress Response        | 1.36E+00             |                                            |                      |
| Regulation of the EMT                          | 1.35E+00             |                                            |                      |
| Clathrin-mediated Endocytosis Signalling       | 1.33E+00             |                                            |                      |
| Intrinsic Prothrombin Activation Pathway       | 1.33E+00             |                                            |                      |
| Glutathione-mediated Detoxification            | 1.32E+00             |                                            |                      |
| Dermatan Sulfate Biosynthesis (Late Stages)    | 1.30E+00             |                                            |                      |

**Supplementary Table 6 | LRSKBr3 vs pSK with ERR $\alpha$  binding site (ChIP-Seq) (pathways)**

| <b>DOWN</b>                                   | <b>-log (p-value)</b> | <b>UP</b>                                       | <b>-log (p-value)</b> |
|-----------------------------------------------|-----------------------|-------------------------------------------------|-----------------------|
| Mechanisms of Viral Exit from Host Cells      | 5.59E+00              | Estrogen-mediated S-phase Entry                 | 7.37E+00              |
| NRF2-mediated Oxidative Stress Response       | 5.57E+00              | Role of CHK Proteins in Cell Cycle Checkpoint   | 6.06E+00              |
| Xenobiotic Metabolism Signalling              | 3.70E+00              | Aryl Hydrocarbon Receptor Signalling            | 5.79E+00              |
| nNOS Signalling in Neurons                    | 3.33E+00              | Mitotic Roles of Polo-Like Kinase               | 5.78E+00              |
| Amyloid Processing                            | 3.09E+00              | Cell Cycle Regulation by BTG Family Proteins    | 5.60E+00              |
| Leukocyte Extravasation Signalling            | 3.04E+00              | Role of BRCA1 in DNA Damage Response            | 5.60E+00              |
| p70S6K Signalling                             | 3.03E+00              | ATM Signalling                                  | 5.60E+00              |
| Regulation of Cellular Mech by Calpain        | 2.76E+00              | Mismatch Repair in Eukaryotes                   | 5.48E+00              |
| Sertoli Cell-Sertoli Cell Junction Signalling | 2.74E+00              | Cyclins and Cell Cycle Regulation               | 4.83E+00              |
| Tight Junction Signalling                     | 2.51E+00              | Protein Ubiquitination Pathway                  | 4.75E+00              |
| Germ Cell-Sertoli Cell Junction Signalling    | 2.44E+00              | Cell Cycle: G2/M DNA Damage Checkpoint Reg      | 4.63E+00              |
| Glutathione Redox Reactions I                 | 2.42E+00              | Hypoxia Signalling in the Cardiovascular System | 4.40E+00              |
| Mitochondrial Dysfunction                     | 2.08E+00              | PI3K/AKT Signalling                             | 4.33E+00              |
| Phenylethylamine Degradation I                | 2.05E+00              | Hereditary Breast Cancer Signalling             | 4.10E+00              |
| Myo-inositol Biosynthesis                     | 2.05E+00              | Cell Cycle: G1/S Checkpoint Regulation          | 3.98E+00              |
| ErbB4 Signalling                              | 2.03E+00              | ERK5 Signalling                                 | 3.85E+00              |
| PI3K/AKT Signalling                           | 2.01E+00              | Cell Cycle Control of Chromosomal Replication   | 3.67E+00              |
| Aryl Hydrocarbon Receptor Signalling          | 2.01E+00              | Molecular Mechanisms of Cancer                  | 3.63E+00              |
| Breast Cancer Regulation by Stathmin1         | 2.00E+00              | Remodeling of Epithelial Adherens Junctions     | 2.99E+00              |
| HER-2 Signalling in Breast Cancer             | 1.99E+00              | Purine Nucleotides Degradation II (Aerobic)     | 2.98E+00              |
| VEGF Signalling                               | 1.97E+00              | Pancreatic Adenocarcinoma Signalling            | 2.91E+00              |
| Calcium-induced T                             | 1.96E+00              | Purine Nucleotides De Novo                      | 2.79E+00              |

|                                                |          |                                            |          |
|------------------------------------------------|----------|--------------------------------------------|----------|
| Lymphocyte Apoptosis                           |          | Biosynthesis II                            |          |
| Integrin Signalling                            | 1.92E+00 | Salvage Pathways of Pyrimidine Ribo        | 2.77E+00 |
| PI3K Signalling in B Lymphocytes               | 1.89E+00 | Adenine and Adenosine Salvage III          | 2.76E+00 |
| ERK5 Signalling                                | 1.88E+00 | GADD45 Signalling                          | 2.76E+00 |
| Histamine Degradation                          | 1.88E+00 | Guanine and Guanosine Salvage I            | 2.68E+00 |
| Epithelial Adherens Junction Signalling        | 1.87E+00 | Urate Biosynthesis/Inosine 5'-phosphate    | 2.65E+00 |
| Pentose Phosphate Pathway (Oxidative)          | 1.84E+00 | Pyridoxal 5'-phosphate Salvage Pathway     | 2.56E+00 |
| Triacylglycerol Degradation                    | 1.80E+00 | NRF2-mediated Oxidative Stress Response    | 2.41E+00 |
| Phenylalanine Degradation IV (Mammalian,)      | 1.79E+00 | Adenosine Nucleotides Degradation II       | 2.40E+00 |
| Aldosterone Signalling in Epithelial Cells     | 1.75E+00 | Aldosterone Signalling in Epithelial Cells | 2.37E+00 |
| Telomerase Signalling                          | 1.73E+00 | Prostate Cancer Signalling                 | 2.34E+00 |
| Chemokine Signalling                           | 1.72E+00 | IL-17A Signalling in Fibroblasts           | 2.32E+00 |
| CDP-diacylglycerol Biosynthesis I              | 1.71E+00 | IL-17A Signalling in Gastric Cells         | 2.30E+00 |
| Methionine Degradation I (to Homocysteine)     | 1.71E+00 | Granzyme B Signalling                      | 2.29E+00 |
| mTOR Signalling                                | 1.70E+00 | Androgen Signalling                        | 2.28E+00 |
| IL-15 Production                               | 1.68E+00 | Inosine-5'-phosphate Biosynthesis II       | 2.21E+00 |
| Superoxide Radicals Degradation                | 1.68E+00 | Huntington's Disease Signalling            | 2.15E+00 |
| Gap Junction Signalling                        | 1.67E+00 | Assembly of RNA Polymerase II Complex      | 2.13E+00 |
| Factors Promoting Cardiogenesis in Vertebrates | 1.63E+00 | Breast Cancer Regulation by Stathmin1      | 2.11E+00 |
| Apoptosis Signalling                           | 1.63E+00 | CD27 Signalling in Lymphocytes             | 2.08E+00 |
| Glutathione-mediated Detoxification            | 1.63E+00 | Guanosine Nucleotides Degradation III      | 1.81E+00 |
| Oxidative Ethanol Degradation III              | 1.63E+00 | Small Cell Lung Cancer Signalling          | 1.80E+00 |
| UVC-Induced MAPK Signalling                    | 1.61E+00 | Colorectal Cancer Metastasis Signalling    | 1.79E+00 |
| Phosphatidylglycerol Biosynthesis II           | 1.56E+00 | TWEAK Signalling                           | 1.79E+00 |
| Putrescine Degradation III                     | 1.56E+00 | GNRH Signalling                            | 1.78E+00 |

|                                             |          |                                            |          |
|---------------------------------------------|----------|--------------------------------------------|----------|
| Cysteine Biosynthesis III (mammalia)        | 1.56E+00 | 14-3-3-mediated Signalling                 | 1.73E+00 |
| Thiamin Salvage III                         | 1.40E+00 | PTEN Signalling                            | 1.73E+00 |
| Methylglyoxal Degradation VI                | 1.40E+00 | Acetate Conversion to Acetyl-CoA           | 1.72E+00 |
| Triacylglycerol Biosynthesis                | 1.40E+00 | HIF1 $\uparrow$ Signalling                 | 1.70E+00 |
| Cholecystokinin/Gastrin-mediated Signalling | 1.33E+00 | Xenobiotic Metabolism Signalling           | 1.62E+00 |
| Paxillin Signalling                         | 1.33E+00 | ILK Signalling                             | 1.59E+00 |
| Stearate Biosynthesis I (Animals)           | 1.32E+00 | Superoxide Radicals Degradation            | 1.55E+00 |
|                                             |          | Methionine Degradation I (to Homocysteine) | 1.54E+00 |
|                                             |          | Glutathione-mediated Detoxification        | 1.43E+00 |
|                                             |          | Purine Ribonucleosides Degradation         | 1.42E+00 |
|                                             |          | Cysteine Biosynthesis III (mammalia)       | 1.39E+00 |
|                                             |          | Xanthine and Xanthosine Salvage            | 1.34E+00 |

**Supplementary Table 7 | siESRRA in LRSKBr3 with ERR $\alpha$  binding site (ChIP-Seq) (pathways)**

| <b>DOWN</b>                                | <b>-log(p-value)</b> | <b>UP</b>                                  | <b>-log(p-value)</b> |
|--------------------------------------------|----------------------|--------------------------------------------|----------------------|
| L-cysteine Degradation II                  | 2.36E+00             | Signalling                                 | 1.69E+00             |
| Cysteine Biosynthesis/Homocysteine         | 2.06E+00             | Phosphatidylcholine Biosynthesis I         | 1.62E+00             |
| Role of Tissue Factor in Cancer            | 1.89E+00             | Sphingosine and Sphingosine-1-phosphate    | 1.56E+00             |
| Insulin Receptor Signalling                | 1.70E+00             | Hematopoiesis from Multipotent Stem Cells  | 1.39E+00             |
| Glycerol Degradation I                     | 1.66E+00             | Choline Biosynthesis III                   | 1.36E+00             |
| Acetyl-CoA Biosynthesis I (PDH)            | 1.59E+00             | Methionine Degradation I (to Homocysteine) | 1.30E+00             |
| Superoxide Radicals Degradation            | 1.59E+00             |                                            |                      |
| Glycogen Biosynthesis II                   | 1.59E+00             |                                            |                      |
| Death Receptor Signalling                  | 1.57E+00             |                                            |                      |
| Aldosterone Signalling in Epithelial Cells | 1.54E+00             |                                            |                      |
| CD40 Signalling                            | 1.51E+00             |                                            |                      |
| ERK5 Signalling                            | 1.50E+00             |                                            |                      |
| B Cell Receptor Signalling                 | 1.49E+00             |                                            |                      |
| Sphingomyelin Metabolism                   | 1.46E+00             |                                            |                      |
| GDNF Family Ligand-Receptor                | 1.45E+00             |                                            |                      |
| Renal Cell Carcinoma Signalling            | 1.42E+00             |                                            |                      |
| Ketolysis                                  | 1.37E+00             |                                            |                      |
| Ketogenesis                                | 1.33E+00             |                                            |                      |
| Dolichyl-diphosphooligosaccharide          | 1.33E+00             |                                            |                      |
| Ceramide Signalling                        | 1.32E+00             |                                            |                      |
| Cysteine Biosynthesis III                  | 1.30E+00             |                                            |                      |
| TCA Cycle II (Eukaryotic)                  | 1.30E+00             |                                            |                      |

**Supplementary Table 8 | ChIP Primers**

| <b>Name</b>      | <b>Sequence</b>             |
|------------------|-----------------------------|
| EGF-1-U          | TGGTGATGAGTCATCTGAATGCAAGC  |
| EGF-1L           | GGTGAAC TTTGGGACTCAGATTTTGG |
| EGF-2-U          | CACACAGACATAACAAGCCAACAAGTG |
| EGF-2L           | TGTCTGCTTGTCTATCCATTTACCTG  |
| EGF-3-U          | CGAGAACATTGTAGACTACCTGCC    |
| EGF-3L           | TCTCTCTTCCC ACTATTCTGAGCC   |
| PARVB-U          | AGATGGGCAAACACAGGCTTAGAG    |
| PARVB-L          | TTAAATGCCAGGAATGACATCAGC    |
| miR-449B-3P-U    | ACTCTCTGTGTGACCTTGGGCACG    |
| miR-449B-3P-L    | CCACCAGGCACAAAGGTAACAAGA    |
| TMEM119-SELPLG-U | CATCATGTCAAGGGCATT TTTCCA   |
| TMEM119-SELPLG-L | CCCTCAGCCTCTAGTGTGATCCTA    |
| CD86-U           | CTTGACCTTTGCAGA AACTCCCA    |
| CD86-L           | CCAGATTATTTCCACCGACAGCAG    |
| LAMA4-U          | GCATTCAGAAACGCTTCTTGCTCA    |
| LAMA4-L          | TGCACTAGTCACTGGTGACACAGC    |
| EGF-9-U          | ATTCCCAGGCACTCAGAGCATGGC    |
| EGF-9L           | GGCAAGGTCCGCACTGAGTCACAG    |
| EGF-10-U         | CTCCTTGGAAGCAGAGAGTGACCG    |
| EGF-10L          | GGTCAGGTCAAACCACAGCTTCCT    |
| EGF-11-U         | CCTCAGGCTCAGTCCATTGACTCT    |
| EGF-11L          | CCACAGCTTCCTCTGACTCAATGT    |
| EGF-12-U         | CAGCATGGTTTGGTGATT CATTGA   |
| EGF-12L          | CGTGTGTGTTATTTCCAGGGTGAG    |
| EGF-13-U         | CAGTCATGTGGAAGGGCAGGAGAG    |
| EGF-13L          | CTGATCTCAGCCTCCCACCTCCAC    |
| EGF-14-U         | GCGTGACTACAATCTTTCCC ACT    |
| EGF-14L          | GCAGCAGACAGAGCAGTGACAGTC    |
| EGF-15-U         | CCTGCCAGTGACCCACCTTCCAG     |
| EGF-15L          | GCCACAGCAACCACAGAGAAGTG     |
| EGF-16-U         | CCACTTTGTGCCAGTCTCCTGTAC    |
| EGF-16L          | GTGACTCAGGTGCCCTTCTCTGTC    |
| EGF-17-U         | GCATTCATTCCAATCAGCACACG     |
| EGF-17L          | CCTCAGGGCTGAGCACTGTATTAA    |
| h18S-U           | GATGGGCGGCGGAAAATAG         |
| h18S-L           | GCGTGGATTCTGCATAATGGT       |
| ERRneg-U         | gtggccacaggtgtcgtcaagtcttc  |
| ERRneg-L         | ggatgcagtgccttctccccagattg  |
| hGSR-F           | TGATTC AATGATCAGCACCAAC     |

|         |                       |
|---------|-----------------------|
| hGSR-R  | CAGTAACCATGCTGACTTCCA |
| hSOD3-F | AGAGAAAGCTCTCTTGGAGGA |
| hSOD3-R | GGCGTACATGTCTCGGAT    |
| hSOD1-F | GGCATCATCAATTTCGAGCA  |
| hSOD1-R | GGCCTTCAGTCAGTCCTTT   |
| hGPX1 F | CGGGGCAAGGTACTACTTAT  |
| hGPX1 R | GTTCTTGGCGTTCTCCTGAT  |
| hSOD2 F | GCTGCTCTATTGTAGCATTCT |
| hSOD2 R | CATCCCTACAAGTCCCCAAA  |

**Supplementary Table 9 | Specific metabolite transitions for quantifier/qualifier ions and ESI modes for GC/MS**

| <b>Metabolite</b>                                                                                                                                                      | <b>Molecular formula</b>                                        | <b>m/z</b>        | <b>RT (min)</b> |
|------------------------------------------------------------------------------------------------------------------------------------------------------------------------|-----------------------------------------------------------------|-------------------|-----------------|
| Pyruvate (methoxime, TBDMS)                                                                                                                                            | C <sub>6</sub> H <sub>12</sub> NO <sub>3</sub> Si               | 171-177 (115)     | 8.926           |
| Lactate (di-TBDMS)                                                                                                                                                     | C <sub>11</sub> H <sub>25</sub> O <sub>3</sub> Si               | 261-264 (233)     | 11.73           |
| Succinate (di-TBDMS)                                                                                                                                                   | C <sub>12</sub> H <sub>25</sub> O <sub>3</sub> Si <sub>2</sub>  | 289-292 (331)     | 14.845          |
| Fumarate (di-TBDMS)                                                                                                                                                    | C <sub>12</sub> H <sub>23</sub> O <sub>4</sub> Si <sub>2</sub>  | 287-290 (329)     | 15.221          |
| Alpha-Ketoglutarate (methoxime, di-TBDMS)                                                                                                                              | C <sub>14</sub> H <sub>28</sub> NO <sub>5</sub> Si <sub>2</sub> | 346-350 (258)     | 17.331          |
| Malate (tri-TBDMS)                                                                                                                                                     | C <sub>18</sub> H <sub>39</sub> O <sub>5</sub> Si <sub>3</sub>  | 419-422 (287)     | 18.239          |
| Glutamate (di-TBDMS)                                                                                                                                                   | C <sub>19</sub> H <sub>42</sub> NO <sub>4</sub> Si <sub>3</sub> | 432-437 (330)     | 19.709          |
| Citrate (tetra-TBDMS)                                                                                                                                                  | C <sub>20</sub> H <sub>39</sub> O <sub>6</sub> Si <sub>3</sub>  | 459-464 (431,403) | 22.394          |
| Isocitrate (tetra-TBDMS)                                                                                                                                               | C <sub>20</sub> H <sub>39</sub> O <sub>6</sub> Si <sub>3</sub>  | 459-464 (431,403) | 22.477          |
| Myristic acid-D27, used as an internal standard, was monitored at m/z 312 (17.979 min). Qualifying ions are indicated in brackets to the right of the quantifying ions |                                                                 |                   |                 |



**Supplementary Table 10 | Specific metabolite transitions for quantifier/qualifier ions and ESI modes for LC/MS**

| <b>Compound</b>                                                                                            | <b>Precursor ion (m/z)</b> | <b>Quantifier ion (m/z)</b> | <b>Collision energy (V)</b> | <b>Qualifier ion (m/z)</b> | <b>Collision energy (V)</b> |
|------------------------------------------------------------------------------------------------------------|----------------------------|-----------------------------|-----------------------------|----------------------------|-----------------------------|
| GSH (M0-M+8)*                                                                                              | 308 (308-316)              | 179                         | 4                           | 76.1                       | 28                          |
| GSSG (M0-M+12)*                                                                                            | 613 (613-625)              | 355.1                       | 16                          | 231.1                      | 28                          |
| Gln                                                                                                        | 147                        | 130                         | 4                           | 84.1                       | 16                          |
| Glu                                                                                                        | 148                        | 130.1                       | 4                           | 84.1                       | 12                          |
| Gly                                                                                                        | 76                         | 47.2                        | 16                          | 42.1                       | 48                          |
| Cys                                                                                                        | 122                        | 76.1                        | 12                          | 59.1                       | 24                          |
| $\gamma$ -Glu-Cys                                                                                          | 251                        | 122.1                       | 4                           | 84.1                       | 24                          |
| Hyp                                                                                                        | 132                        | 68.1                        | 20                          | 86.1                       | 20                          |
| $\alpha$ KG                                                                                                | 145                        | 101                         | 0                           | 57.1                       | 4                           |
| Compounds from the Sha method are detected in positive mode and $\alpha$ KG (Shn method) is negative mode. |                            |                             |                             |                            |                             |
| Hyp = Hydroxyproline.                                                                                      |                            |                             |                             |                            |                             |
| *range of m/z values detected in labeling experiments                                                      |                            |                             |                             |                            |                             |

## Supplementary Methods

**GC/MS and mass isotopomer distribution analysis.** Cells were treated and pulsed with 10 mM U-<sup>13</sup>C-glucose (uniformly labelled, Cambridge Isotope Laboratories, CLM-1396, 99%) or 2 mM U-<sup>13</sup>C-glutamine (Cambridge Isotope Laboratories, CLM-1822, 97-99%) as described in Experimental Procedures. After 30 minutes, media was removed and plates were put on ice. Cells were washed with 2 ml of ice cold saline solution (9g/l NaCl) and quenched with 600 µl 80% methanol (v/v) on dry ice. Cells were harvested and sonicated 10 min at a high setting (30 sec on, 30 sec off) with a Biorupter bath sonicator (Diagenode). Lysates were cleared at 21,000 g for 10 min at 4°C. Supernatants were transferred to cold vacuum centrifuge (Labconco) at -4°C and evaporated to complete dryness. Pellets were dissolved in 30 µl pyridine containing 10 mg/ml methoxyamine hydrochloride (Sigma), sonicated, vortexed, and heated at 70°C for 30 min before centrifugation. Supernatant were transferred to GC/MS auto-injection amber vials. Following addition of 70 µL of *N-tert*-Butyldimethylsilyl-*N*-methyltrifluoroacetamide (MTBSTA, 394882, Sigma)), samples were heated for an additional hour at 70°C. GC/MS instrumentation and software (Agilent) were the same as previously described <sup>2</sup>. One µl of derivatised sample was injected into GC/MS. Acquisition methods were performed using retention time locking on Myristic acid-D<sub>27</sub> (RT : 17.98 min). After retention time and spectral confirmation against authentic standards, data acquisition for stable isotope tracer analysis was done with Single Ion Monitoring (SIM). The fragments analysed are presented in Supplementary Table 10. Fragment identification required acceptable retention time, mass spectrum (acquired in scan mode), the presence of all quantifying ions (M+K, where M is the atomic mass of the M-57 fragment of TBDMS-

derivatised metabolites, and K the number of possible  $^{13}\text{C}$ ) in SIM acquisition, and the presence of at least 1 qualifying ion. Ion integrals were corrected for the contribution of naturally occurring isotopes ( $^2\text{H}$ ,  $^3\text{H}$ ,  $^{13}\text{C}$ ,  $^{14}\text{C}$ ,  $^{15}\text{N}$ , etc.) using fragment-specific matrices as described previously published in-house algorithm <sup>3</sup>. The final data represented the proportional flux where each  $m+i$  (with  $i : 0 \rightarrow K$ ) represents a fraction of the total pool of metabolite extracted from the sample, the latter being set at 1. The use of a thirty minute pulse time prevents multiple iterations of the citric acid cycle, to allowing the analysis of early and unsaturated isotopic enrichments.

**LC/MS Metabolite measurements.** Metabolite measurements: The authentic metabolite standards were purchased from Sigma-Aldrich Co., while the following LC/MS grade solvents and additives were purchased from Fisher: ammonium acetate, formic acid, water, methanol, and acetonitrile. Sample extraction: Metabolites from pSKBr3 and LRSKBr3 cells ( $1.5 \times 10^7$  cells) were extracted using 380  $\mu\text{l}$  of LC/MS grade 50% methanol/50% water mixture and 220  $\mu\text{l}$  of cold acetonitrile. Samples were then homogenized by bead beating 2 min at 30 Hz (TissueLyser, Qiagen). A volume of 300  $\mu\text{l}$  of ice-cold water and 600  $\mu\text{l}$  of ice-cold methylene chloride were added to the lysates. Samples were vortexed and allowed to rest on ice for 10 min for phase separation followed by centrifugation at 4,000 rpm for 5 min. The upper aqueous layer was transferred to a fresh pre-chilled tube. Samples were dried by vacuum centrifugation operating at  $-4^\circ\text{C}$  (Labconco). Samples were re-suspended in 50  $\mu\text{l}$  of water and clarified by centrifugation for 15 min at 15,000 rpm at  $1^\circ\text{C}$ . Samples were maintained at  $4^\circ\text{C}$  for the duration of the LC-MS/MS analysis in the autosampler. LC-MS/MS analysis:

Samples were separated by U-HPLC (Ultra-High Performance Liquid Chromatography) (1290 Infinity, Agilent Technologies) using a Scherzo SM-C18 (3 mm x 150 mm) 3  $\mu$ m column and guard column (Imtakt USA) operating at 10°C. For LC/MS analysis using method 1, solvent “A” consisted of 5 mM ammonium acetate in water and solvent “B” consisted of 200 mM ammonium acetate in 80% water and 20% acetonitrile. Metabolites were separated using a linear gradient from 0% to 100% “B” over a period of 5 min followed by 5 min at 100% “B” at flow rate of 0.4 ml/min. For LC/MS analysis using method 2, solvent “A” consisted of 100 mM formic acid in water and solvent “B” consisted of 200 mM ammonium formate in 30% acetonitrile and 70% water (adjusted to pH 8 using  $\text{NH}_4\text{OH}$ ). Metabolites were separated using 100% A (0-2 min), then a linear gradient from 0% to 80% “B” (2-8 min) followed by 5 min at 100% “B” (8-13 min). For LC/MS analysis using method 3, solvent “A” consisted of 0.2% formic acid in water and solvent “B” consisted of 0.2% formic acid in MeOH. Metabolites were separated using 100% A (0-2 min), then a linear gradient from 0% to 80% “B” (2-8 min) followed by 5 min at 100% “B” (8-13 min). Flow rate was 0.4 mL/min for methods 1, 2 and 3. For all of the methods used above, the column was re-equilibrated for 6 min at 100% “A” before the next run. Metabolites were eluted into an electrospray ionization source (ESI) and detected by Multiple Reaction Monitoring (MRM) using a triple quadrupole mass spectrometer (6430 QQQ, Agilent Technologies). Specific metabolite transitions for quantifier/qualifier ions and ESI modes are listed in Supplemental Table S10. Quantifying ion integrated intensities were compared to external calibration curves collected at the same time as sample mass spectrometric data acquisition. The table S10

includes LC run conditions as well as ESI mode and MRM transitions chosen for absolute quantification.

For glutathione fractional labelling assessment, the procedure was modified as follow. Cells were pre-equilibrated in regular media for 2h, media was then replaced for media containing 4 mM  $^{13}\text{C}_5$ -glutamine (Sigma-Aldrich, 605166, 98% atom) for 6h. Cells were washed twice with cold 150 mM ammonium formate pH 7.2 and quenched with 600  $\mu\text{L}$  acetonitrile/methanol/water (3:5:2) extraction buffer on dry ice. Three ceramic beads were added to each tubes and samples were vortexed 30 sec and sonicated 5 min at a high setting (30 sec on, 30 sec off) with a Biorupter bath sonicator (Diagenode) in a cold room. 600  $\mu\text{L}$  dichloromethane and 300  $\mu\text{L}$  water were added to each samples and tubes were vigorously shaken for 15 sec. Samples were left undisturbed on ice for 10 min then lysates were cleared at 8,000 g for 5 min at 4°C. Upper aqueous phases were transferred to cold centri-trap (Labconco) at -4°C and evaporated to complete dryness.

## References

1. Possemato R, *et al.* Functional genomics reveal that the serine synthesis pathway is essential in breast cancer. *Nature* **476**, 346-350 (2011).
2. Morita M, *et al.* mTORC1 controls mitochondrial activity and biogenesis through 4E-BP-dependent translational regulation. *Cell Metab* **18**, 698-711 (2013).
3. Nanchen A, Fuhrer T, Sauer U. Determination of metabolic flux ratios from  $^{13}\text{C}$ -experiments and gas chromatography-mass spectrometry data: protocol and principles. *Methods Mol Biol* **358**, 177-197 (2007).
